# Supplementary material for: Vitamin D3exacerbates steatosis while calcipotriol inhibits inflammation in non-alcoholic fatty liver disease inSod1knockout mice: a comparative study of two forms of vitamin D
Source: Royal Society of Chemistry journal article supplement (doi:10.1039/d4fo00215f), 2024-01-01
Supplement: d4fo00215f1.pdf [file d4fo00215f1.pdf]

ESI Table 1 qPCR primer sequences

|          | Forward                 | Reverse                 |
|----------|-------------------------|-------------------------|
| mFatp2   | TCCGGTGGAAAGGAGAGAAC    | GCACGCCATACACATTCACT    |
| mCd36    | TGGCTAAATGAGACTGGGAC    | TCCAATCCCAAGTAAGGCCAT   |
| mPlin2   | TGTTGAGCACATCGAGTCAC    | GGCCTGATCTTGAATGTTCTGT  |
| mDgat2   | CAGGTGCCGTCTTGGGTTAT    | CAGGAGGATATGCGCCAGAG    |
| mPnpla2  | GTCCTTACCATCCGCTTG      | GATGCTACCCGTCTGCTCT     |
| mCebpa   | AATGGCAGTGTGCACGTCTA    | CCCCAGCCGTTAGTGAAGAG    |
| mBcl2l1  | GACAAGGAGATGCAGGTATTGG  | TCCCGTAGAGATCCACAAAAGT  |
| mBcl2l11 | CCCGGAGATACGGATTGCAC    | GCCTCGCGGTAATCATTTCGC   |
| mBax     | CTCAAGGCCCTGTGCACTA     | CAGACAAGCAGCCGCTCAC     |
| mBak1    | TCGCACAGAGAGGCGGTTG     | CTGAAGAATCTGTGTACCACGAA |
| mRipk3   | AATCCAATGACAGGGCCAC     | AGTTGTAGTTCCCAATCTGCAC  |
| mMkl     | AGATCCCATTTGAAGGCTGT    | GGTTCCTGCTTCTTGTCCTCA   |
| mIi-1a   | AGGGAGTCAACTCATTGGCG    | TGGCAGAACTGTAGTCTTCGT   |
| mIi-1b   | AGGTCAAAGTTTTGGAAGCA    | TGAAGCAGCTATGGCAACTG    |
| mIi-6    | TGGTACTCCAGAAGACCAGAGG  | AACGATGATGCACTTGCAGA    |
| mTnf     | ACTCAAATGGGCTTTCCGAA    | GACAGAGGCAACCTGACCAC    |
| mAdgre1  | TGACTCACCTTGTGGTCCTAA   | CTTCCCAGAATCCAGTCTTTCC  |
| mNfkb1   | AGCACATAGATGAACTCCGGGA  | TCCTTCCTGCCATAACCGT     |
| mCol1a1  | GCTCCTCTTAGGGGCCACT     | CCACGTCTCACCATTGGGG     |
| mCol1a2  | ATGGCTGCTCCAAAAGACAA    | TCAGCACCACCAATGTCCAGA   |
| mCol3a1  | CTGTAACATGGAAACTGGGGAAA | CCATAGCTGAACTGAAAACCACC |
| mDesmin  | GTGGATGCAGCCACTCTAGC    | TTAGCCGCGATGGTCTCATAC   |
| mVdr     | TGGCTTCAGGGACCTCACCTC   | ACATGATCACCTCAATGGCACT  |
| mCyp2r1  | CGGGTGTATGGCGAGATTTT    | AAGGAAGGCATGGTCTATCTG   |
| mCyp27b1 | TTGTCCCAGATCTTGACCCA    | GGGTCATGGGCTTGATAGGA    |
| mCyp24a1 | ACGGTAGGCTGCTGAGATTT    | TCTGGTCCCTGAAGTTCACC    |
| mGapdh   | TTGGGCTACACTGAGGACCA    | GCCGTATTCATTGTCATACCAGG |
| mSod1 WT | TGAACCAGTTGTGTTGTCAGG   | TCCATCACTGGTCACTAGCC    |
| mSod1 KO | CTTCTCGTCTTGCTCTCTCTGGT | CCTCGCACACATTCCACATCC   |
